# Supplementary material
Source: MDPI journal article supplement (https://www.mdpi.com/2312-7481/6/4/60)

# checkCIF/PLATON report

Structure factors have been supplied for datablock(s) hol2

THIS REPORT IS FOR GUIDANCE ONLY. IF USED AS PART OF A REVIEW PROCEDURE FOR PUBLICATION, IT SHOULD NOT REPLACE THE EXPERTISE OF AN EXPERIENCED CRYSTALLOGRAPHIC REFEREE.

No syntax errors found.      CIF dictionary      Interpreting this report

## Datablock: hol2

---

|                        |                                                    |                                                    |
|------------------------|----------------------------------------------------|----------------------------------------------------|
| Bond precision:        | C-C = 0.0094 Å                                     | Wavelength=0.79272                                 |
| Cell:                  | a=20.115(4)                                        | b=19.538(2)      c=25.698(5)                       |
|                        | alpha=90                                           | beta=104.258(16)      gamma=90                     |
| Temperature:           | 100 K                                              |                                                    |
|                        | Calculated                                         | Reported                                           |
| Volume                 | 9788(3)                                            | 9788(3)                                            |
| Space group            | P 21/c                                             | P 21/c                                             |
| Hall group             | -P 2ybc                                            | -P 2ybc                                            |
| Moiety formula         | C46 H39 Ho N10 O4, C H2<br>Cl2, C H4 O [+ solvent] | C46 H39 Ho N10 O4, C H2<br>Cl2, C H4 O [+ SOLVENT] |
| Sum formula            | C48 H45 Cl2 Ho N10 O5 [+<br>solvent]               | C48 H45 Cl2 Ho N10 O5                              |
| Mr                     | 1077.77                                            | 1077.77                                            |
| Dx, g cm <sup>-3</sup> | 1.463                                              | 1.463                                              |
| Z                      | 8                                                  | 8                                                  |
| Mu (mm <sup>-1</sup> ) | 2.362                                              | 2.375                                              |
| F000                   | 4352.0                                             | 4352.0                                             |
| F000'                  | 4354.87                                            |                                                    |
| h,k,lmax               | 24,23,30                                           | 24,23,30                                           |
| Nref                   | 17894                                              | 17880                                              |
| Tmin,Tmax              | 0.752,0.827                                        | 0.001,1.000                                        |
| Tmin'                  | 0.652                                              |                                                    |

Correction method= # Reported T Limits: Tmin=0.001 Tmax=1.000  
AbsCorr = EMPIRICAL

Data completeness= 0.999      Theta(max)= 28.500

R(reflections)= 0.0528( 13358)      wR2(reflections)= 0.1601( 17880)

S = 1.270      Npar= 1206

---

The following ALERTS were generated. Each ALERT has the format

**test-name\_ALERT\_alert-type\_alert-level.**

Click on the hyperlinks for more details of the test.

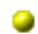

### Alert level C

|                   |                                                  |                          |                                 |         |              |
|-------------------|--------------------------------------------------|--------------------------|---------------------------------|---------|--------------|
| PLAT220_ALERT_2_C | NonSolvent Resd 2                                | C                        | Ueq(max) / Ueq(min) Range       | 3.2     | Ratio        |
| PLAT241_ALERT_2_C | High                                             | MainMol                  | Ueq as Compared to Neighbors of | C11A    | Check        |
| PLAT244_ALERT_4_C | Low                                              | Solvent                  | Ueq as Compared to Neighbors of | C3S     | Check        |
| PLAT244_ALERT_4_C | Low                                              | Solvent                  | Ueq as Compared to Neighbors of | C4S     | Check        |
| PLAT260_ALERT_2_C | Large Average                                    | Ueq of Residue Including | C11                             | 0.153   | Check        |
| PLAT260_ALERT_2_C | Large Average                                    | Ueq of Residue Including | C13                             | 0.159   | Check        |
| PLAT342_ALERT_3_C | Low Bond Precision on                            | C-C Bonds                | .....                           | 0.00944 | Ang.         |
| PLAT414_ALERT_2_C | Short Intra D-H..H-X                             | H5                       | ..H23H                          | 1.92    | Ang.         |
|                   |                                                  |                          | x,y,z =                         | 1_555   | Check        |
| PLAT420_ALERT_2_C | D-H Without Acceptor                             | N5                       | --H5                            | .       | Please Check |
| PLAT906_ALERT_3_C | Large K Value in the Analysis of Variance        | .....                    |                                 | 3.345   | Check        |
| PLAT911_ALERT_3_C | Missing FCF Refl Between Thmin & STh/L=          | 0.600                    |                                 | 14      | Report       |
| PLAT978_ALERT_2_C | Number C-C Bonds with Positive Residual Density. |                          |                                 | 0       | Info         |

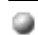

### Alert level G

|                   |                                                  |                 |  |         |        |
|-------------------|--------------------------------------------------|-----------------|--|---------|--------|
| ABSMU01_ALERT_1_G | Calculation of _exptl_absorpt_correction_mu      |                 |  |         |        |
|                   | not performed for this radiation type.           |                 |  |         |        |
| PLAT002_ALERT_2_G | Number of Distance or Angle Restraints on AtSite |                 |  | 7       | Note   |
| PLAT007_ALERT_5_G | Number of Unrefined Donor-H Atoms                | .....           |  | 3       | Report |
| PLAT083_ALERT_2_G | SHELXL Second Parameter in WGHT                  | Unusually Large |  | 9.41    | Why ?  |
| PLAT092_ALERT_4_G | Check: Wavelength Given is not Cu,Ga,Mo,Ag,In Ka |                 |  | 0.79272 | Ang.   |
| PLAT172_ALERT_4_G | The CIF-Embedded .res File Contains DFIX Records |                 |  | 4       | Report |
| PLAT605_ALERT_4_G | Largest Solvent Accessible VOID in the Structure |                 |  | 101     | A**3   |
| PLAT720_ALERT_4_G | Number of Unusual/Non-Standard Labels            | .....           |  | 11      | Note   |
| PLAT860_ALERT_3_G | Number of Least-Squares Restraints               | .....           |  | 4       | Note   |
| PLAT869_ALERT_4_G | ALERTS Related to the Use of SQUEEZE Suppressed  |                 |  | !       | Info   |
| PLAT909_ALERT_3_G | Percentage of I>2sig(I) Data at Theta(Max) Still |                 |  | 56%     | Note   |
| PLAT913_ALERT_3_G | Missing # of Very Strong Reflections in FCF      | ....            |  | 1       | Note   |
| PLAT933_ALERT_2_G | Number of OMIT Records in Embedded .res File     | ...             |  | 13      | Note   |

0 **ALERT level A** = Most likely a serious problem - resolve or explain  
0 **ALERT level B** = A potentially serious problem, consider carefully  
12 **ALERT level C** = Check. Ensure it is not caused by an omission or oversight  
13 **ALERT level G** = General information/check it is not something unexpected

1 ALERT type 1 CIF construction/syntax error, inconsistent or missing data  
10 ALERT type 2 Indicator that the structure model may be wrong or deficient  
6 ALERT type 3 Indicator that the structure quality may be low  
7 ALERT type 4 Improvement, methodology, query or suggestion  
1 ALERT type 5 Informative message, check

It is advisable to attempt to resolve as many as possible of the alerts in all categories. Often the minor alerts point to easily fixed oversights, errors and omissions in your CIF or refinement strategy, so attention to these fine details can be worthwhile. In order to resolve some of the more serious problems it may be necessary to carry out additional measurements or structure refinements. However, the purpose of your study may justify the reported deviations and the more serious of these should normally be commented upon in the discussion or experimental section of a paper or in the "special\_details" fields of the CIF. checkCIF was carefully designed to identify outliers and unusual parameters, but every test has its limitations and alerts that are not important in a particular case may appear. Conversely, the absence of alerts does not guarantee there are no aspects of the results needing attention. It is up to the individual to critically assess their own results and, if necessary, seek expert advice.

### **Publication of your CIF in IUCr journals**

A basic structural check has been run on your CIF. These basic checks will be run on all CIFs submitted for publication in IUCr journals (*Acta Crystallographica*, *Journal of Applied Crystallography*, *Journal of Synchrotron Radiation*); however, if you intend to submit to *Acta Crystallographica Section C* or *E* or *IUCrData*, you should make sure that full publication checks are run on the final version of your CIF prior to submission.

### **Publication of your CIF in other journals**

Please refer to the *Notes for Authors* of the relevant journal for any special instructions relating to CIF submission.

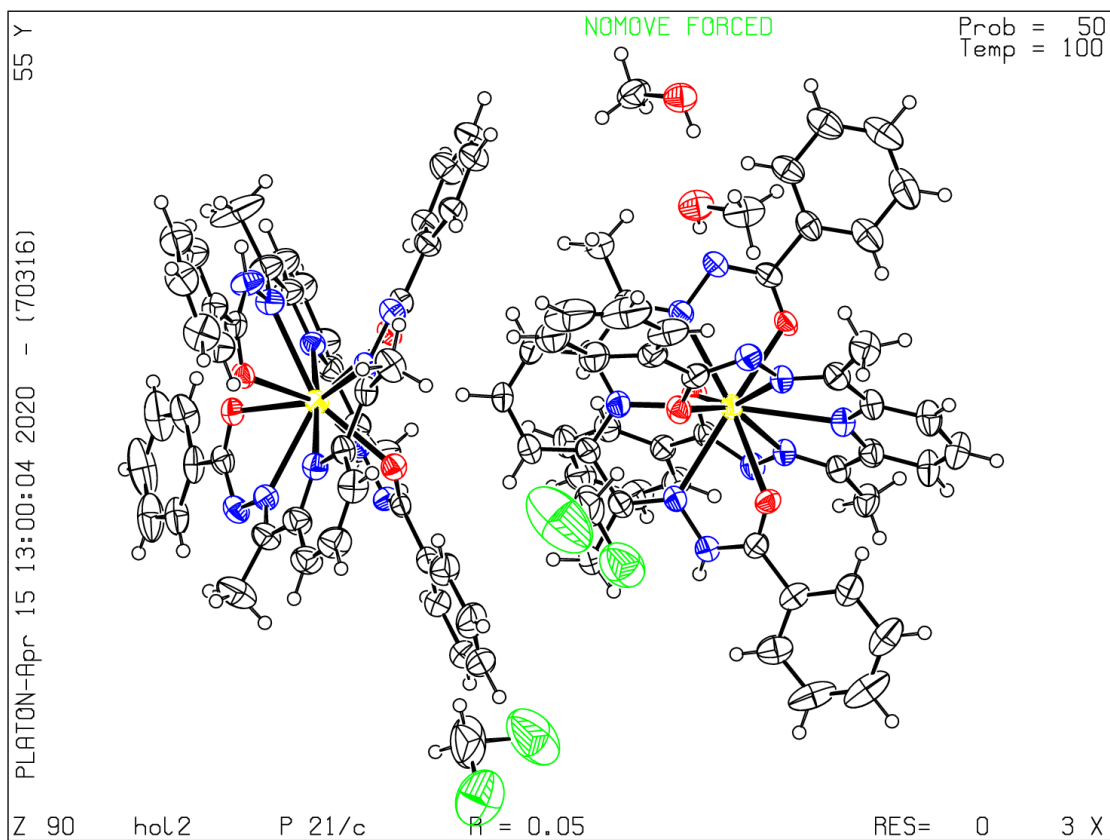

Supplement: s1 [file s1]
