# Supplementary material
Source: MDPI journal article supplement (https://www.mdpi.com/2312-7481/6/4/60)

# checkCIF/PLATON report

Structure factors have been supplied for datablock(s) r

THIS REPORT IS FOR GUIDANCE ONLY. IF USED AS PART OF A REVIEW PROCEDURE FOR PUBLICATION, IT SHOULD NOT REPLACE THE EXPERTISE OF AN EXPERIENCED CRYSTALLOGRAPHIC REFEREE.

No syntax errors found.      CIF dictionary      Interpreting this report

## Datablock: r

---

Bond precision:    C-C = 0.0100 Å

Wavelength=0.71073

Cell:                a=12.6856(12)        b=13.2662(13)        c=17.0051(16)  
                      alpha=84.098(2)      beta=74.746(2)      gamma=62.038(2)  
Temperature:        120 K

|                | Calculated                             | Reported                              |
|----------------|----------------------------------------|---------------------------------------|
| Volume         | 2437.9(4)                              | 2437.9(4)                             |
| Space group    | P -1                                   | P -1                                  |
| Hall group     | -P 1                                   | -P 1                                  |
| Moiety formula | C100 H94 Dy2 N20 O16, 2(C2 H6 O), H2 O | C50 H47 Dy N10 O8, C2 H6 O, (H2 O)0.5 |
| Sum formula    | C104 H108 Dy2 N20 O19                  | C52 H54 Dy N10 O9.50                  |
| Mr             | 2267.11                                | 1133.55                               |
| Dx,g cm-3      | 1.544                                  | 1.544                                 |
| Z              | 1                                      | 2                                     |
| Mu (mm-1)      | 1.603                                  | 1.603                                 |
| F000           | 1156.0                                 | 1156.0                                |
| F000'          | 1156.05                                |                                       |
| h,k,lmax       | 17,18,23                               | 17,18,23                              |
| Nref           | 12944                                  | 12799                                 |
| Tmin,Tmax      | 0.674,0.737                            | 0.611,0.746                           |
| Tmin'          | 0.593                                  |                                       |

Correction method= # Reported T Limits: Tmin=0.611 Tmax=0.746

AbsCorr = MULTI-SCAN

Data completeness= 0.989

Theta(max)= 29.000

R(reflections)= 0.0578( 10484)

wR2(reflections)= 0.1571( 12799)

S = 1.122

Npar= 673

---

The following ALERTS were generated. Each ALERT has the format

**test-name\_ALERT\_alert-type\_alert-level.**

Click on the hyperlinks for more details of the test.

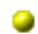

### Alert level C

|                   |                                                  |                             |         |        |
|-------------------|--------------------------------------------------|-----------------------------|---------|--------|
| PLAT213_ALERT_2_C | Atom C14A                                        | has ADP max/min Ratio ..... | 3.4     | prolat |
| PLAT220_ALERT_2_C | NonSolvent Resd 1 C                              | Ueq(max) / Ueq(min) Range   | 4.5     | Ratio  |
| PLAT222_ALERT_3_C | NonSolvent Resd 1 H                              | Uiso(max)/Uiso(min) Range   | 4.2     | Ratio  |
| PLAT241_ALERT_2_C | High MainMol Ueq as Compared to Neighbors of     |                             | 01A     | Check  |
| PLAT342_ALERT_3_C | Low Bond Precision on C-C Bonds .....            |                             | 0.00997 | Ang.   |
| PLAT911_ALERT_3_C | Missing FCF Refl Between Thmin & STh/L=          | 0.600                       | 32      | Report |
| PLAT918_ALERT_3_C | Reflection(s) with I(obs) much Smaller I(calc) . |                             | 1       | Check  |

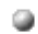

### Alert level G

|                   |                                                  |                |        |        |
|-------------------|--------------------------------------------------|----------------|--------|--------|
| PLAT007_ALERT_5_G | Number of Unrefined Donor-H Atoms .....          |                | 6      | Report |
| PLAT042_ALERT_1_G | Calc. and Reported MoietyFormula Strings Differ  |                | Please | Check  |
| PLAT045_ALERT_1_G | Calculated and Reported Z Differ by a Factor ... |                | 0.50   | Check  |
| PLAT154_ALERT_1_G | The s.u.'s on the Cell Angles are Equal ..(Note) |                | 0.002  | Degree |
| PLAT232_ALERT_2_G | Hirshfeld Test Diff (M-X) Dyl                    | --01           | 6.2    | s.u.   |
| PLAT300_ALERT_4_G | Atom Site Occupancy of O4                        | Constrained at | 0.5    | Check  |
| PLAT300_ALERT_4_G | Atom Site Occupancy of O4'                       | Constrained at | 0.5    | Check  |
| PLAT300_ALERT_4_G | Atom Site Occupancy of C7A'                      | Constrained at | 0.5    | Check  |
| PLAT300_ALERT_4_G | Atom Site Occupancy of C8A'                      | Constrained at | 0.5    | Check  |
| PLAT300_ALERT_4_G | Atom Site Occupancy of C9A'                      | Constrained at | 0.5    | Check  |
| PLAT300_ALERT_4_G | Atom Site Occupancy of C7A                       | Constrained at | 0.5    | Check  |
| PLAT300_ALERT_4_G | Atom Site Occupancy of C8A                       | Constrained at | 0.5    | Check  |
| PLAT300_ALERT_4_G | Atom Site Occupancy of C9A                       | Constrained at | 0.5    | Check  |
| PLAT300_ALERT_4_G | Atom Site Occupancy of C10"                      | Constrained at | 0.5    | Check  |
| PLAT300_ALERT_4_G | Atom Site Occupancy of C10A                      | Constrained at | 0.5    | Check  |
| PLAT300_ALERT_4_G | Atom Site Occupancy of C11"                      | Constrained at | 0.5    | Check  |
| PLAT300_ALERT_4_G | Atom Site Occupancy of C11A                      | Constrained at | 0.5    | Check  |
| PLAT300_ALERT_4_G | Atom Site Occupancy of C12"                      | Constrained at | 0.5    | Check  |
| PLAT300_ALERT_4_G | Atom Site Occupancy of C12A                      | Constrained at | 0.5    | Check  |
| PLAT300_ALERT_4_G | Atom Site Occupancy of C13"                      | Constrained at | 0.5    | Check  |
| PLAT300_ALERT_4_G | Atom Site Occupancy of C13A                      | Constrained at | 0.5    | Check  |
| PLAT300_ALERT_4_G | Atom Site Occupancy of C18                       | Constrained at | 0.5    | Check  |
| PLAT300_ALERT_4_G | Atom Site Occupancy of C18'                      | Constrained at | 0.5    | Check  |
| PLAT300_ALERT_4_G | Atom Site Occupancy of C19                       | Constrained at | 0.5    | Check  |
| PLAT300_ALERT_4_G | Atom Site Occupancy of C19'                      | Constrained at | 0.5    | Check  |
| PLAT300_ALERT_4_G | Atom Site Occupancy of C20                       | Constrained at | 0.5    | Check  |
| PLAT300_ALERT_4_G | Atom Site Occupancy of C20'                      | Constrained at | 0.5    | Check  |
| PLAT300_ALERT_4_G | Atom Site Occupancy of C21                       | Constrained at | 0.5    | Check  |
| PLAT300_ALERT_4_G | Atom Site Occupancy of C21'                      | Constrained at | 0.5    | Check  |
| PLAT300_ALERT_4_G | Atom Site Occupancy of C22                       | Constrained at | 0.5    | Check  |
| PLAT300_ALERT_4_G | Atom Site Occupancy of C22'                      | Constrained at | 0.5    | Check  |
| PLAT300_ALERT_4_G | Atom Site Occupancy of C25                       | Constrained at | 0.5    | Check  |
| PLAT300_ALERT_4_G | Atom Site Occupancy of C25'                      | Constrained at | 0.5    | Check  |
| PLAT300_ALERT_4_G | Atom Site Occupancy of H3NA                      | Constrained at | 0.5    | Check  |
| PLAT300_ALERT_4_G | Atom Site Occupancy of H3B                       | Constrained at | 0.5    | Check  |
| PLAT300_ALERT_4_G | Atom Site Occupancy of H9AA                      | Constrained at | 0.5    | Check  |
| PLAT300_ALERT_4_G | Atom Site Occupancy of H9AB                      | Constrained at | 0.5    | Check  |
| PLAT300_ALERT_4_G | Atom Site Occupancy of H10B                      | Constrained at | 0.5    | Check  |
| PLAT300_ALERT_4_G | Atom Site Occupancy of H10C                      | Constrained at | 0.5    | Check  |
| PLAT300_ALERT_4_G | Atom Site Occupancy of H12B                      | Constrained at | 0.5    | Check  |
| PLAT300_ALERT_4_G | Atom Site Occupancy of H12C                      | Constrained at | 0.5    | Check  |
| PLAT300_ALERT_4_G | Atom Site Occupancy of H13B                      | Constrained at | 0.5    | Check  |
| PLAT300_ALERT_4_G | Atom Site Occupancy of H13C                      | Constrained at | 0.5    | Check  |
| PLAT300_ALERT_4_G | Atom Site Occupancy of H18A                      | Constrained at | 0.5    | Check  |
| PLAT300_ALERT_4_G | Atom Site Occupancy of H18B                      | Constrained at | 0.5    | Check  |

|                   |                                                  |                |       |        |
|-------------------|--------------------------------------------------|----------------|-------|--------|
| PLAT300_ALERT_4_G | Atom Site Occupancy of H19A                      | Constrained at | 0.5   | Check  |
| PLAT300_ALERT_4_G | Atom Site Occupancy of H19B                      | Constrained at | 0.5   | Check  |
| PLAT300_ALERT_4_G | Atom Site Occupancy of H21A                      | Constrained at | 0.5   | Check  |
| PLAT300_ALERT_4_G | Atom Site Occupancy of H21B                      | Constrained at | 0.5   | Check  |
| PLAT300_ALERT_4_G | Atom Site Occupancy of H22A                      | Constrained at | 0.5   | Check  |
| PLAT300_ALERT_4_G | Atom Site Occupancy of H22B                      | Constrained at | 0.5   | Check  |
| PLAT300_ALERT_4_G | Atom Site Occupancy of H25D                      | Constrained at | 0.5   | Check  |
| PLAT300_ALERT_4_G | Atom Site Occupancy of H25E                      | Constrained at | 0.5   | Check  |
| PLAT300_ALERT_4_G | Atom Site Occupancy of H25F                      | Constrained at | 0.5   | Check  |
| PLAT300_ALERT_4_G | Atom Site Occupancy of H25G                      | Constrained at | 0.5   | Check  |
| PLAT300_ALERT_4_G | Atom Site Occupancy of H25H                      | Constrained at | 0.5   | Check  |
| PLAT300_ALERT_4_G | Atom Site Occupancy of H25I                      | Constrained at | 0.5   | Check  |
| PLAT300_ALERT_4_G | Atom Site Occupancy of O1S                       | Constrained at | 0.5   | Check  |
| PLAT300_ALERT_4_G | Atom Site Occupancy of C1S                       | Constrained at | 0.5   | Check  |
| PLAT300_ALERT_4_G | Atom Site Occupancy of C2S                       | Constrained at | 0.5   | Check  |
| PLAT300_ALERT_4_G | Atom Site Occupancy of H1SO                      | Constrained at | 0.5   | Check  |
| PLAT300_ALERT_4_G | Atom Site Occupancy of H1SA                      | Constrained at | 0.5   | Check  |
| PLAT300_ALERT_4_G | Atom Site Occupancy of H1SB                      | Constrained at | 0.5   | Check  |
| PLAT300_ALERT_4_G | Atom Site Occupancy of H2SA                      | Constrained at | 0.5   | Check  |
| PLAT300_ALERT_4_G | Atom Site Occupancy of H2SB                      | Constrained at | 0.5   | Check  |
| PLAT300_ALERT_4_G | Atom Site Occupancy of H2SC                      | Constrained at | 0.5   | Check  |
| PLAT300_ALERT_4_G | Atom Site Occupancy of O2S                       | Constrained at | 0.5   | Check  |
| PLAT300_ALERT_4_G | Atom Site Occupancy of C3S                       | Constrained at | 0.5   | Check  |
| PLAT300_ALERT_4_G | Atom Site Occupancy of C4S                       | Constrained at | 0.5   | Check  |
| PLAT300_ALERT_4_G | Atom Site Occupancy of H3SA                      | Constrained at | 0.5   | Check  |
| PLAT300_ALERT_4_G | Atom Site Occupancy of H3SB                      | Constrained at | 0.5   | Check  |
| PLAT300_ALERT_4_G | Atom Site Occupancy of H4SA                      | Constrained at | 0.5   | Check  |
| PLAT300_ALERT_4_G | Atom Site Occupancy of H4SB                      | Constrained at | 0.5   | Check  |
| PLAT300_ALERT_4_G | Atom Site Occupancy of H4SC                      | Constrained at | 0.5   | Check  |
| PLAT300_ALERT_4_G | Atom Site Occupancy of H2SD                      | Constrained at | 0.5   | Check  |
| PLAT300_ALERT_4_G | Atom Site Occupancy of O1W                       | Constrained at | 0.5   | Check  |
| PLAT300_ALERT_4_G | Atom Site Occupancy of H1WA                      | Constrained at | 0.5   | Check  |
| PLAT300_ALERT_4_G | Atom Site Occupancy of H1WB                      | Constrained at | 0.5   | Check  |
| PLAT301_ALERT_3_G | Main Residue Disorder .....(Resd 1 )             |                | 20%   | Note   |
| PLAT302_ALERT_4_G | Anion/Solvent/Minor-Residue Disorder (Resd 2 )   |                | 100%  | Note   |
| PLAT302_ALERT_4_G | Anion/Solvent/Minor-Residue Disorder (Resd 3 )   |                | 100%  | Note   |
| PLAT302_ALERT_4_G | Anion/Solvent/Minor-Residue Disorder (Resd 4 )   |                | 100%  | Note   |
| PLAT304_ALERT_4_G | Non-Integer Number of Atoms in ..... (Resd 2 )   |                | 4.50  | Check  |
| PLAT304_ALERT_4_G | Non-Integer Number of Atoms in ..... (Resd 3 )   |                | 4.50  | Check  |
| PLAT304_ALERT_4_G | Non-Integer Number of Atoms in ..... (Resd 4 )   |                | 1.50  | Check  |
| PLAT335_ALERT_2_G | Check Large C6 Ring C-C Range C17 -C22           |                | 0.19  | Ang.   |
| PLAT335_ALERT_2_G | Check Large C6 Ring C-C Range C17 -C22'          |                | 0.19  | Ang.   |
| PLAT398_ALERT_2_G | Deviating C-O-C Angle From 120 for O3A           |                | 18.7  | Degree |
| PLAT413_ALERT_2_G | Short Inter XH3 .. XHn H18B ..H24F .             |                | 2.12  | Ang.   |
|                   | 1-x,-y,2-z =                                     |                | 2_657 | Check  |
| PLAT414_ALERT_2_G | Short Intra D-H..H-X H3NA ..H14D                 |                | 1.91  | Ang.   |
|                   | x,y,z =                                          |                | 1_555 | Check  |
| PLAT414_ALERT_2_G | Short Intra D-H..H-X H3B ..H13A                  |                | 2.04  | Ang.   |
|                   | x,y,z =                                          |                | 1_555 | Check  |
| PLAT414_ALERT_2_G | Short Intra D-H..H-X H3B ..H14A                  |                | 1.89  | Ang.   |
|                   | x,y,z =                                          |                | 1_555 | Check  |
| PLAT720_ALERT_4_G | Number of Unusual/Non-Standard Labels .....      |                | 23    | Note   |
| PLAT790_ALERT_4_G | Centre of Gravity not Within Unit Cell: Resd. #  |                | 2     | Note   |
|                   | C2 H6 O                                          |                |       |        |
| PLAT790_ALERT_4_G | Centre of Gravity not Within Unit Cell: Resd. #  |                | 3     | Note   |
|                   | C2 H6 O                                          |                |       |        |
| PLAT790_ALERT_4_G | Centre of Gravity not Within Unit Cell: Resd. #  |                | 4     | Note   |
|                   | H2 O                                             |                |       |        |
| PLAT804_ALERT_5_G | Number of ARU-Code Packing Problem(s) in PLATON  |                | 1     | Info   |
| PLAT870_ALERT_4_G | ALERTS Related to Twinning Effects Suppressed .. |                | !     | Info   |
| PLAT912_ALERT_4_G | Missing # of FCF Reflections Above STh/L= 0.600  |                | 118   | Note   |
| PLAT931_ALERT_5_G | CIFcalcFCF Twin Law ( 1 2 0 ) Est.d BASF         |                | 0.39  | Check  |

|                                                                    |         |
|--------------------------------------------------------------------|---------|
| PLAT933_ALERT_2_G Number of OMIT Records in Embedded .res File ... | 19 Note |
| PLAT960_ALERT_3_G Number of Intensities with I < - 2*sig(I) ...    | 4 Check |

---

|     |                      |                                                              |
|-----|----------------------|--------------------------------------------------------------|
| 0   | <b>ALERT level A</b> | = Most likely a serious problem - resolve or explain         |
| 0   | <b>ALERT level B</b> | = A potentially serious problem, consider carefully          |
| 7   | <b>ALERT level C</b> | = Check. Ensure it is not caused by an omission or oversight |
| 102 | <b>ALERT level G</b> | = General information/check it is not something unexpected   |

  

|    |              |                                                              |
|----|--------------|--------------------------------------------------------------|
| 3  | ALERT type 1 | CIF construction/syntax error, inconsistent or missing data  |
| 12 | ALERT type 2 | Indicator that the structure model may be wrong or deficient |
| 6  | ALERT type 3 | Indicator that the structure quality may be low              |
| 85 | ALERT type 4 | Improvement, methodology, query or suggestion                |
| 3  | ALERT type 5 | Informative message, check                                   |

---

It is advisable to attempt to resolve as many as possible of the alerts in all categories. Often the minor alerts point to easily fixed oversights, errors and omissions in your CIF or refinement strategy, so attention to these fine details can be worthwhile. In order to resolve some of the more serious problems it may be necessary to carry out additional measurements or structure refinements. However, the purpose of your study may justify the reported deviations and the more serious of these should normally be commented upon in the discussion or experimental section of a paper or in the "special\_details" fields of the CIF. checkCIF was carefully designed to identify outliers and unusual parameters, but every test has its limitations and alerts that are not important in a particular case may appear. Conversely, the absence of alerts does not guarantee there are no aspects of the results needing attention. It is up to the individual to critically assess their own results and, if necessary, seek expert advice.

### Publication of your CIF in IUCr journals

A basic structural check has been run on your CIF. These basic checks will be run on all CIFs submitted for publication in IUCr journals (*Acta Crystallographica*, *Journal of Applied Crystallography*, *Journal of Synchrotron Radiation*); however, if you intend to submit to *Acta Crystallographica Section C* or *E* or *IUCrData*, you should make sure that full publication checks are run on the final version of your CIF prior to submission.

### Publication of your CIF in other journals

Please refer to the *Notes for Authors* of the relevant journal for any special instructions relating to CIF submission.

---

**PLATON version of 22/12/2019; check.def file version of 13/12/2019**

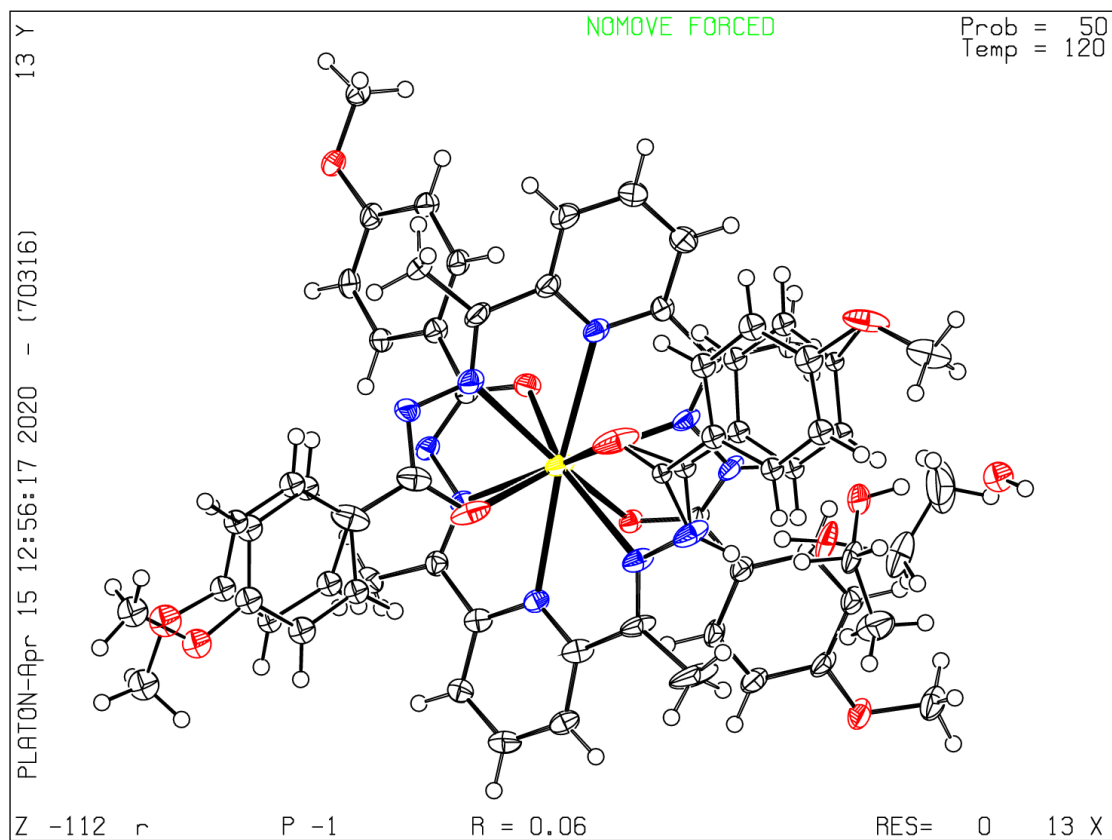

Supplement: s1 [file s1]
