# Supplementary material
Source: MDPI journal article supplement (https://www.mdpi.com/2312-7481/6/4/60)

# checkCIF/PLATON report

Structure factors have been supplied for datablock(s) a\_sq

THIS REPORT IS FOR GUIDANCE ONLY. IF USED AS PART OF A REVIEW PROCEDURE FOR PUBLICATION, IT SHOULD NOT REPLACE THE EXPERTISE OF AN EXPERIENCED CRYSTALLOGRAPHIC REFEREE.

No syntax errors found.      CIF dictionary      Interpreting this report

## Datablock: a\_sq

---

|                 |                                           |                                |
|-----------------|-------------------------------------------|--------------------------------|
| Bond precision: | C-C = 0.0199 A                            | Wavelength=0.71073             |
| Cell:           | a=14.0526(14)                             | b=14.0526(14)      c=46.815(5) |
|                 | alpha=90                                  | beta=90      gamma=90          |
| Temperature:    | 120 K                                     |                                |
|                 | Calculated                                | Reported                       |
| Volume          | 9245(2)                                   | 9245(2)                        |
| Space group     | P 43                                      | P 43                           |
| Hall group      | P 4cw                                     | P 4cw                          |
| Moiety formula  | 2(C46 H39 Dy N10 O4), 3(H2 O) [+ solvent] | C46 H39 Dy N10 O4, 1.5(H2 O)   |
| Sum formula     | C92 H84 Dy2 N20 O11 [+ solvent]           | C46 H42 Dy N10 O5.50           |
| Mr              | 1970.79                                   | 985.39                         |
| Dx, g cm-3      | 1.416                                     | 1.416                          |
| Z               | 4                                         | 8                              |
| Mu (mm-1)       | 1.673                                     | 1.673                          |
| F000            | 3984.0                                    | 3984.0                         |
| F000'           | 3983.80                                   |                                |
| h,k,lmax        | 18,18,61                                  | 18,18,61                       |
| Nref            | 22365[ 11318]                             | 21755                          |
| Tmin,Tmax       | 0.685,0.706                               | 0.598,0.746                    |
| Tmin'           | 0.672                                     |                                |

Correction method= # Reported T Limits: Tmin=0.598 Tmax=0.746  
AbsCorr = MULTI-SCAN

Data completeness= 1.92/0.97      Theta(max)= 28.000

R(reflections)= 0.0625( 15345)      wR2(reflections)= 0.1397( 21755)

S = 0.992      Npar= 1123

---

The following ALERTS were generated. Each ALERT has the format

**test-name\_ALERT\_alert-type\_alert-level.**

Click on the hyperlinks for more details of the test.

---

**Alert level B**

|                   |                                                |          |
|-------------------|------------------------------------------------|----------|
| PLAT201_ALERT_2_B | Isotropic non-H Atoms in Main Residue(s) ..... | 9 Report |
| C2A'              | C2 C3A' C3 C4A' C4                             | etc.     |

**Author Response: Due to severe disorder on the ligands some atoms were refined isotropically.**

|                   |                      |     |        |   |              |
|-------------------|----------------------|-----|--------|---|--------------|
| PLAT420_ALERT_2_B | D-H Without Acceptor | O2W | --H2WB | . | Please Check |
|-------------------|----------------------|-----|--------|---|--------------|

**Author Response: This is because the SQUEEZE procedure has been applied.**

---

**Alert level C**

|                   |                                               |              |
|-------------------|-----------------------------------------------|--------------|
| PLAT220_ALERT_2_C | NonSolvent Resd 1 C Ueq(max) / Ueq(min) Range | 3.9 Ratio    |
| PLAT241_ALERT_2_C | High MainMol Ueq as Compared to Neighbors of  | C19 Check    |
| PLAT241_ALERT_2_C | High MainMol Ueq as Compared to Neighbors of  | C19A Check   |
| PLAT331_ALERT_2_C | Small Aver Phenyl C-C Dist C17 --C22 .        | 1.37 Ang.    |
| PLAT342_ALERT_3_C | Low Bond Precision on C-C Bonds .....         | 0.01992 Ang. |
| PLAT911_ALERT_3_C | Missing FCF Refl Between Thmin & STh/L= 0.600 | 3 Report     |
| PLAT973_ALERT_2_C | Check Calcd Positive Resid. Density on Dy1    | 1.07 eA-3    |
| PLAT973_ALERT_2_C | Check Calcd Positive Resid. Density on Dy2    | 1.02 eA-3    |
| PLAT975_ALERT_2_C | Check Calcd Resid. Dens. 1.09A From N4A       | 0.54 eA-3    |
| PLAT977_ALERT_2_C | Check Negative Difference Density on H3WA     | -0.32 eA-3   |
| PLAT977_ALERT_2_C | Check Negative Difference Density on H23E     | -0.35 eA-3   |

---

**Alert level G**

|                   |                                                    |              |
|-------------------|----------------------------------------------------|--------------|
| PLAT002_ALERT_2_G | Number of Distance or Angle Restraints on AtSite   | 24 Note      |
| PLAT007_ALERT_5_G | Number of Unrefined Donor-H Atoms .....            | 8 Report     |
| PLAT033_ALERT_4_G | Flack x Value Deviates > 3.0 * sigma from Zero .   | 0.215 Note   |
| PLAT042_ALERT_1_G | Calc. and Reported MoietyFormula Strings Differ    | Please Check |
| PLAT045_ALERT_1_G | Calculated and Reported Z Differ by a Factor ...   | 0.50 Check   |
| PLAT171_ALERT_4_G | The CIF-Embedded .res File Contains EADP Records   | 8 Report     |
| PLAT172_ALERT_4_G | The CIF-Embedded .res File Contains DFIX Records   | 4 Report     |
| PLAT176_ALERT_4_G | The CIF-Embedded .res File Contains SADI Records   | 4 Report     |
| PLAT301_ALERT_3_G | Main Residue Disorder .....(Resd 1 )               | 10% Note     |
| PLAT301_ALERT_3_G | Main Residue Disorder .....(Resd 2 )               | 5% Note      |
| PLAT380_ALERT_4_G | Incorrectly? Oriented X(sp2)-Methyl Moiety .....   | C23 Check    |
| PLAT380_ALERT_4_G | Incorrectly? Oriented X(sp2)-Methyl Moiety .....   | C23A Check   |
| PLAT412_ALERT_2_G | Short Intra XH3 .. XHn H2 ..H14C .                 | 2.09 Ang.    |
|                   | x,y,z = 1_555                                      | Check        |
| PLAT412_ALERT_2_G | Short Intra XH3 .. XHn H4 ..H23A .                 | 1.98 Ang.    |
|                   | x,y,z = 1_555                                      | Check        |
| PLAT412_ALERT_2_G | Short Intra XH3 .. XHn H23A ..H4' .                | 1.93 Ang.    |
|                   | x,y,z = 1_555                                      | Check        |
| PLAT412_ALERT_2_G | Short Intra XH3 .. XHn H14I ..H2B' .               | 1.89 Ang.    |
|                   | x,y,z = 1_555                                      | Check        |
| PLAT606_ALERT_4_G | VERY LARGE Solvent Accessible VOID(S) in Structure | ! Info       |
| PLAT720_ALERT_4_G | Number of Unusual/Non-Standard Labels .....        | 19 Note      |
| PLAT860_ALERT_3_G | Number of Least-Squares Restraints .....           | 21 Note      |
| PLAT869_ALERT_4_G | ALERTS Related to the Use of SQUEEZE Suppressed    | ! Info       |
| PLAT910_ALERT_3_G | Missing # of FCF Reflection(s) Below Theta(Min).   | 2 Note       |

|                   |                                                  |   |       |
|-------------------|--------------------------------------------------|---|-------|
| PLAT913_ALERT_3_G | Missing # of Very Strong Reflections in FCF .... | 1 | Note  |
| PLAT933_ALERT_2_G | Number of OMIT Records in Embedded .res File ... | 8 | Note  |
| PLAT960_ALERT_3_G | Number of Intensities with I < - 2*sig(I) ...    | 4 | Check |
| PLAT978_ALERT_2_G | Number C-C Bonds with Positive Residual Density. | 1 | Info  |

---

0 **ALERT level A** = Most likely a serious problem - resolve or explain  
 2 **ALERT level B** = A potentially serious problem, consider carefully  
 11 **ALERT level C** = Check. Ensure it is not caused by an omission or oversight  
 25 **ALERT level G** = General information/check it is not something unexpected

2 ALERT type 1 CIF construction/syntax error, inconsistent or missing data  
 18 ALERT type 2 Indicator that the structure model may be wrong or deficient  
 8 ALERT type 3 Indicator that the structure quality may be low  
 9 ALERT type 4 Improvement, methodology, query or suggestion  
 1 ALERT type 5 Informative message, check

---

It is advisable to attempt to resolve as many as possible of the alerts in all categories. Often the minor alerts point to easily fixed oversights, errors and omissions in your CIF or refinement strategy, so attention to these fine details can be worthwhile. In order to resolve some of the more serious problems it may be necessary to carry out additional measurements or structure refinements. However, the purpose of your study may justify the reported deviations and the more serious of these should normally be commented upon in the discussion or experimental section of a paper or in the "special\_details" fields of the CIF. checkCIF was carefully designed to identify outliers and unusual parameters, but every test has its limitations and alerts that are not important in a particular case may appear. Conversely, the absence of alerts does not guarantee there are no aspects of the results needing attention. It is up to the individual to critically assess their own results and, if necessary, seek expert advice.

### Publication of your CIF in IUCr journals

A basic structural check has been run on your CIF. These basic checks will be run on all CIFs submitted for publication in IUCr journals (*Acta Crystallographica*, *Journal of Applied Crystallography*, *Journal of Synchrotron Radiation*); however, if you intend to submit to *Acta Crystallographica Section C* or *E* or *IUCrData*, you should make sure that full publication checks are run on the final version of your CIF prior to submission.

### Publication of your CIF in other journals

Please refer to the *Notes for Authors* of the relevant journal for any special instructions relating to CIF submission.

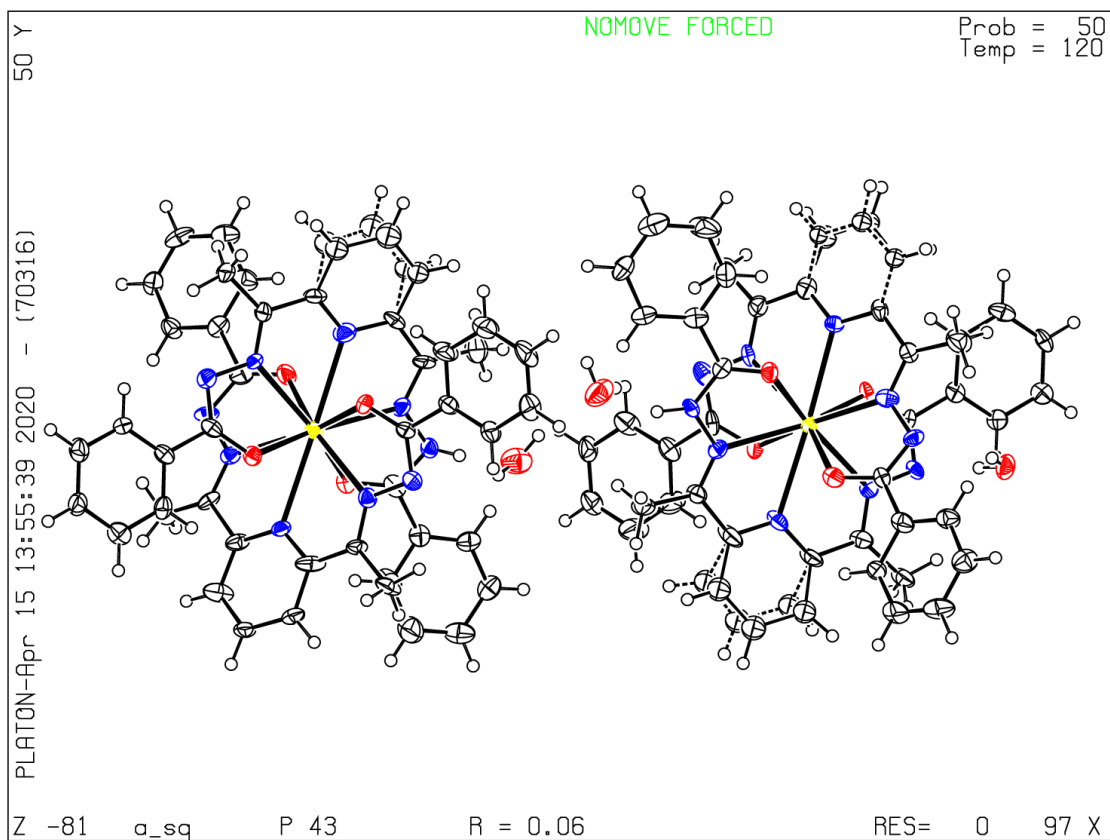

Supplement: s1 [file s1]
